# Supplementary material
Source: PubMed Central journal article supplement (PMC4579449)

## Supplements

**Figure S1:** 16S rRNA amplicon clustering to genera for the emulsion and sausage microbiome. The samples originating from the same raw materials are clustered together.

- 5 **Figure S2:** Phylogenetic tree of the OTUs classified as *Yersinia* and selected reference sequence. OTU denovo2230, similar to *Yersinia pseudotuberculosis*, contained a total of 3,438 sequences.

- 10 **Figure S3:** HindIII ribopatterns of LAB from cultured surface, air and product samples. The numerical analysis of pattern similarities is presented as a dendrogram and converted to percentages for convenience. Bands on the left have high molecular masses of 23 kbp; those on the right have low molecular masses of 1,000 bp.

**Table S1.** Number of OTUs and alpha diversity indices for each sample.

**Table S2.** Detailed results for OTU relative abundance in all samples

- 15 **Table S3.** Bacterial levels in raw material, sausage emulsion and sausages on both MRS (LAB) and PCA (total bacteria) agar.

**Table S4.** Sensory evaluation results and LAB levels in sausages analyzed on last day of shelf life

- 20 **Table S5.** Results from numerical analysis of HindIII ribopatterns based on the origin of sample.

Relative abundance

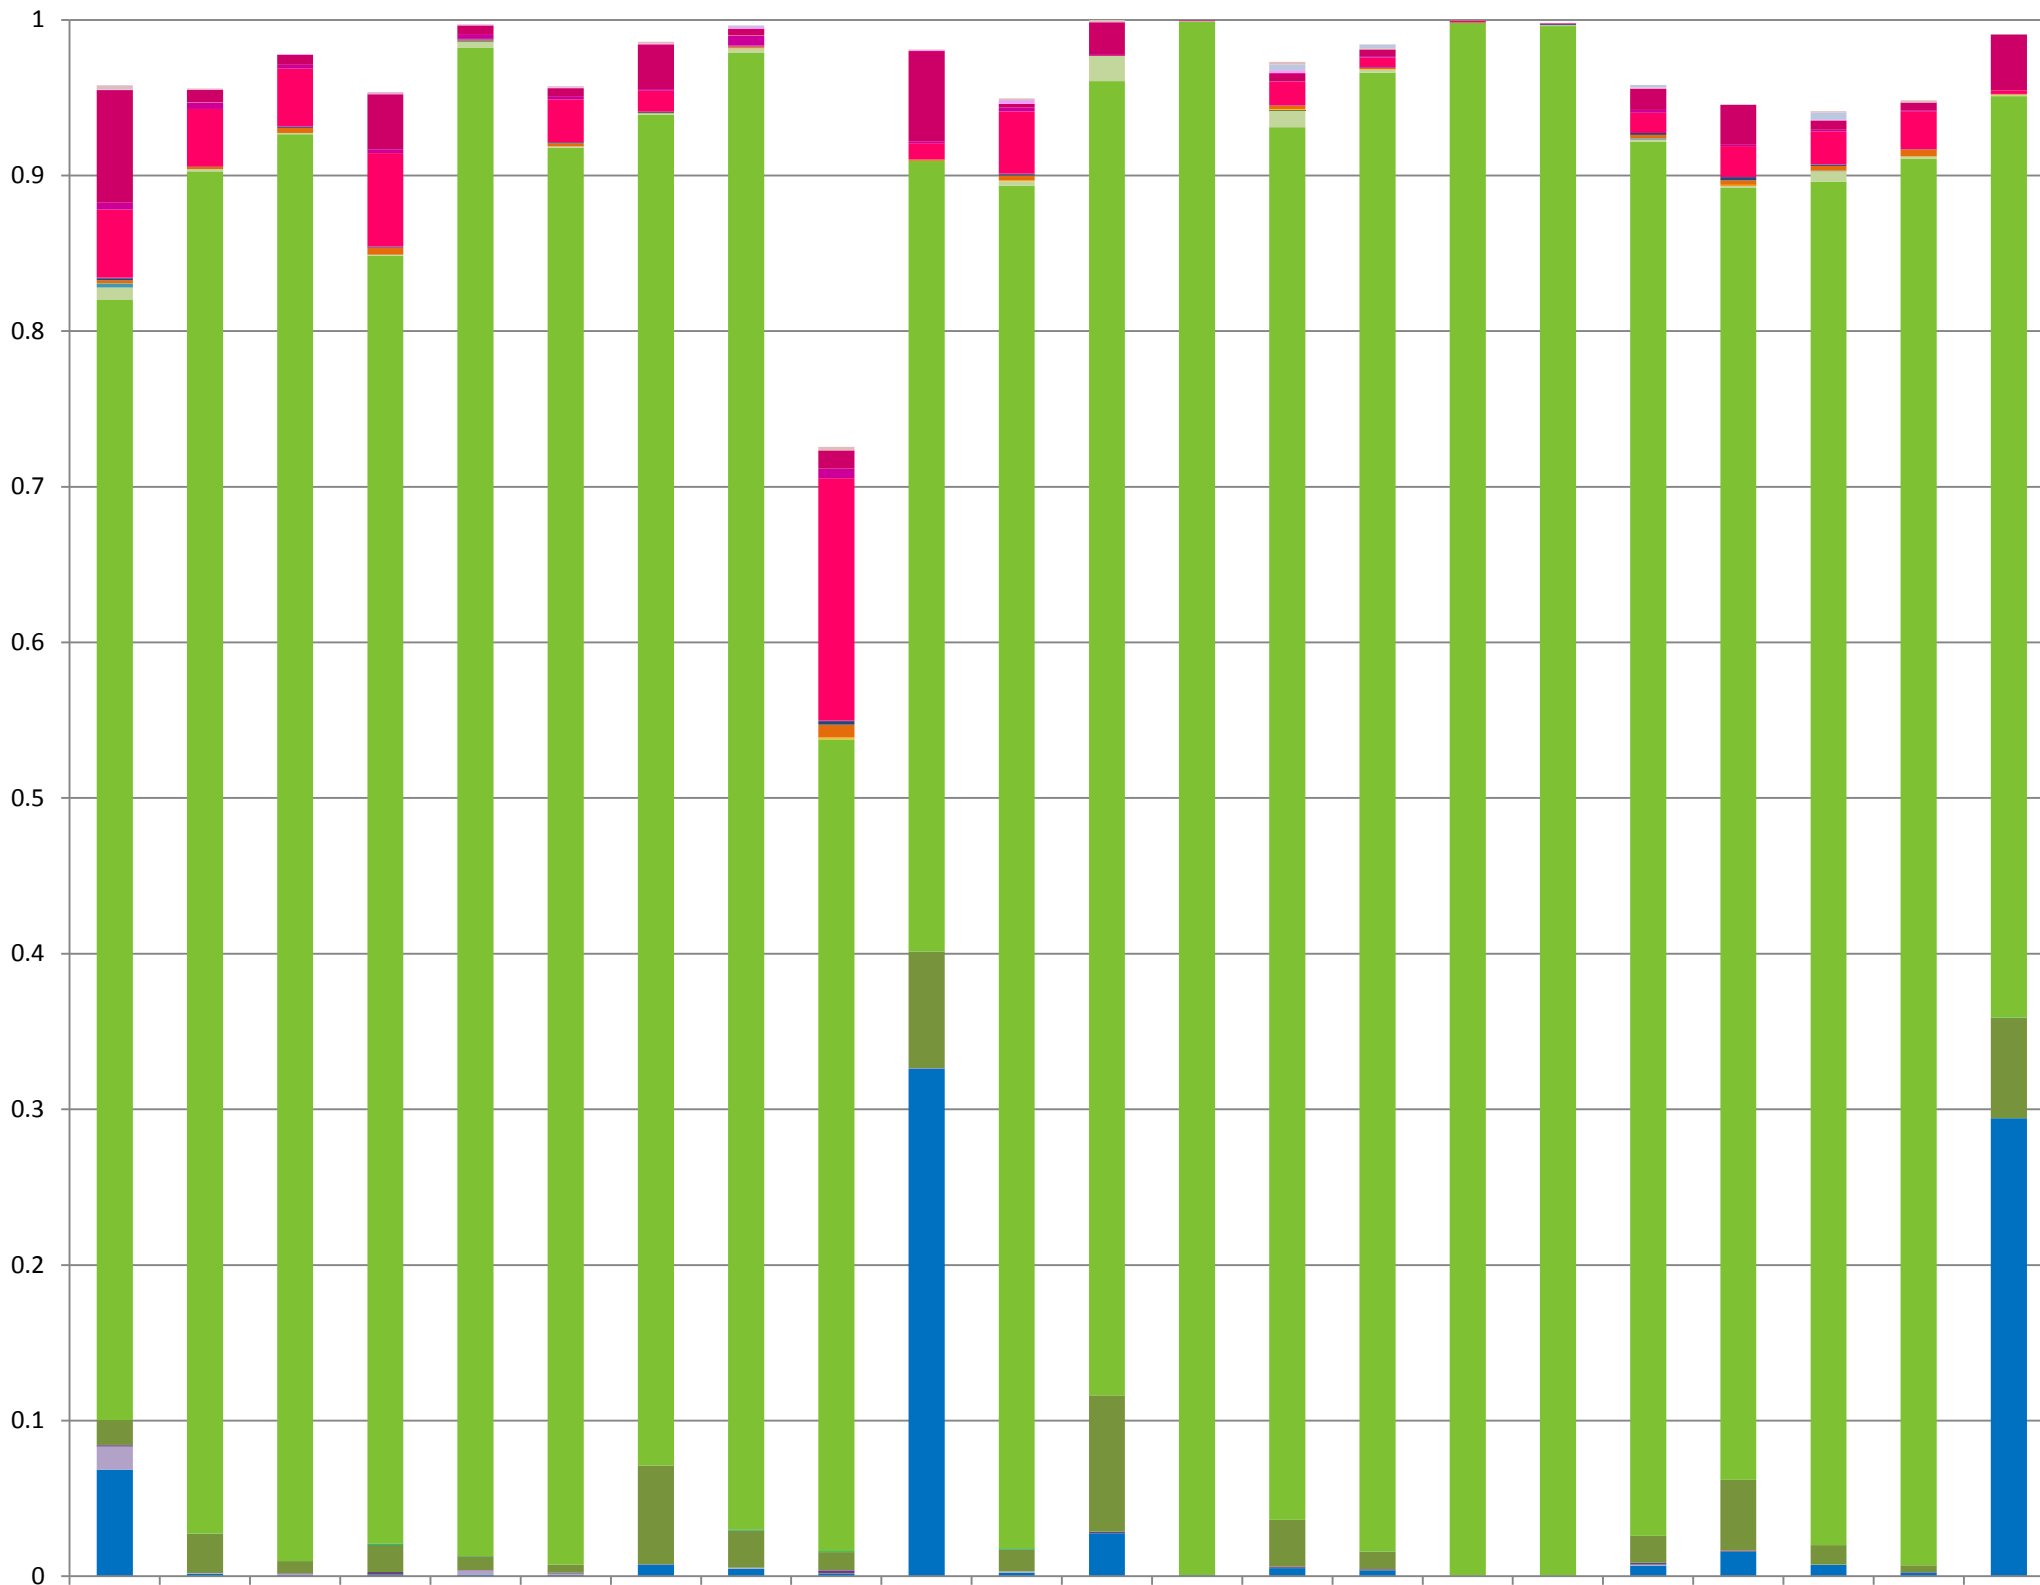

- other (>1%)
- Thermales
- Deinococcales
- Gammaproteobacteria (C )
- Vibrionales
- Pseudomonadales
- Oceanospirillales
- Enterobacteriales
- Chromatiales
- Alteromonadales
- Burkholderiales
- Sphingomonadales
- Rhodobacterales
- Rhizobiales
- Caulobacterales
- Fusobacteriales
- Firmicutes
  - Halanaerobiales
  - Clostridiales
  - Lactobacillales
  - Exiguobacterales
  - Bacillales
- Bacteroidetes
  - Sphingobacteriales
  - Flavobacteriales
  - Bacteroidales
  - Actinomycetales

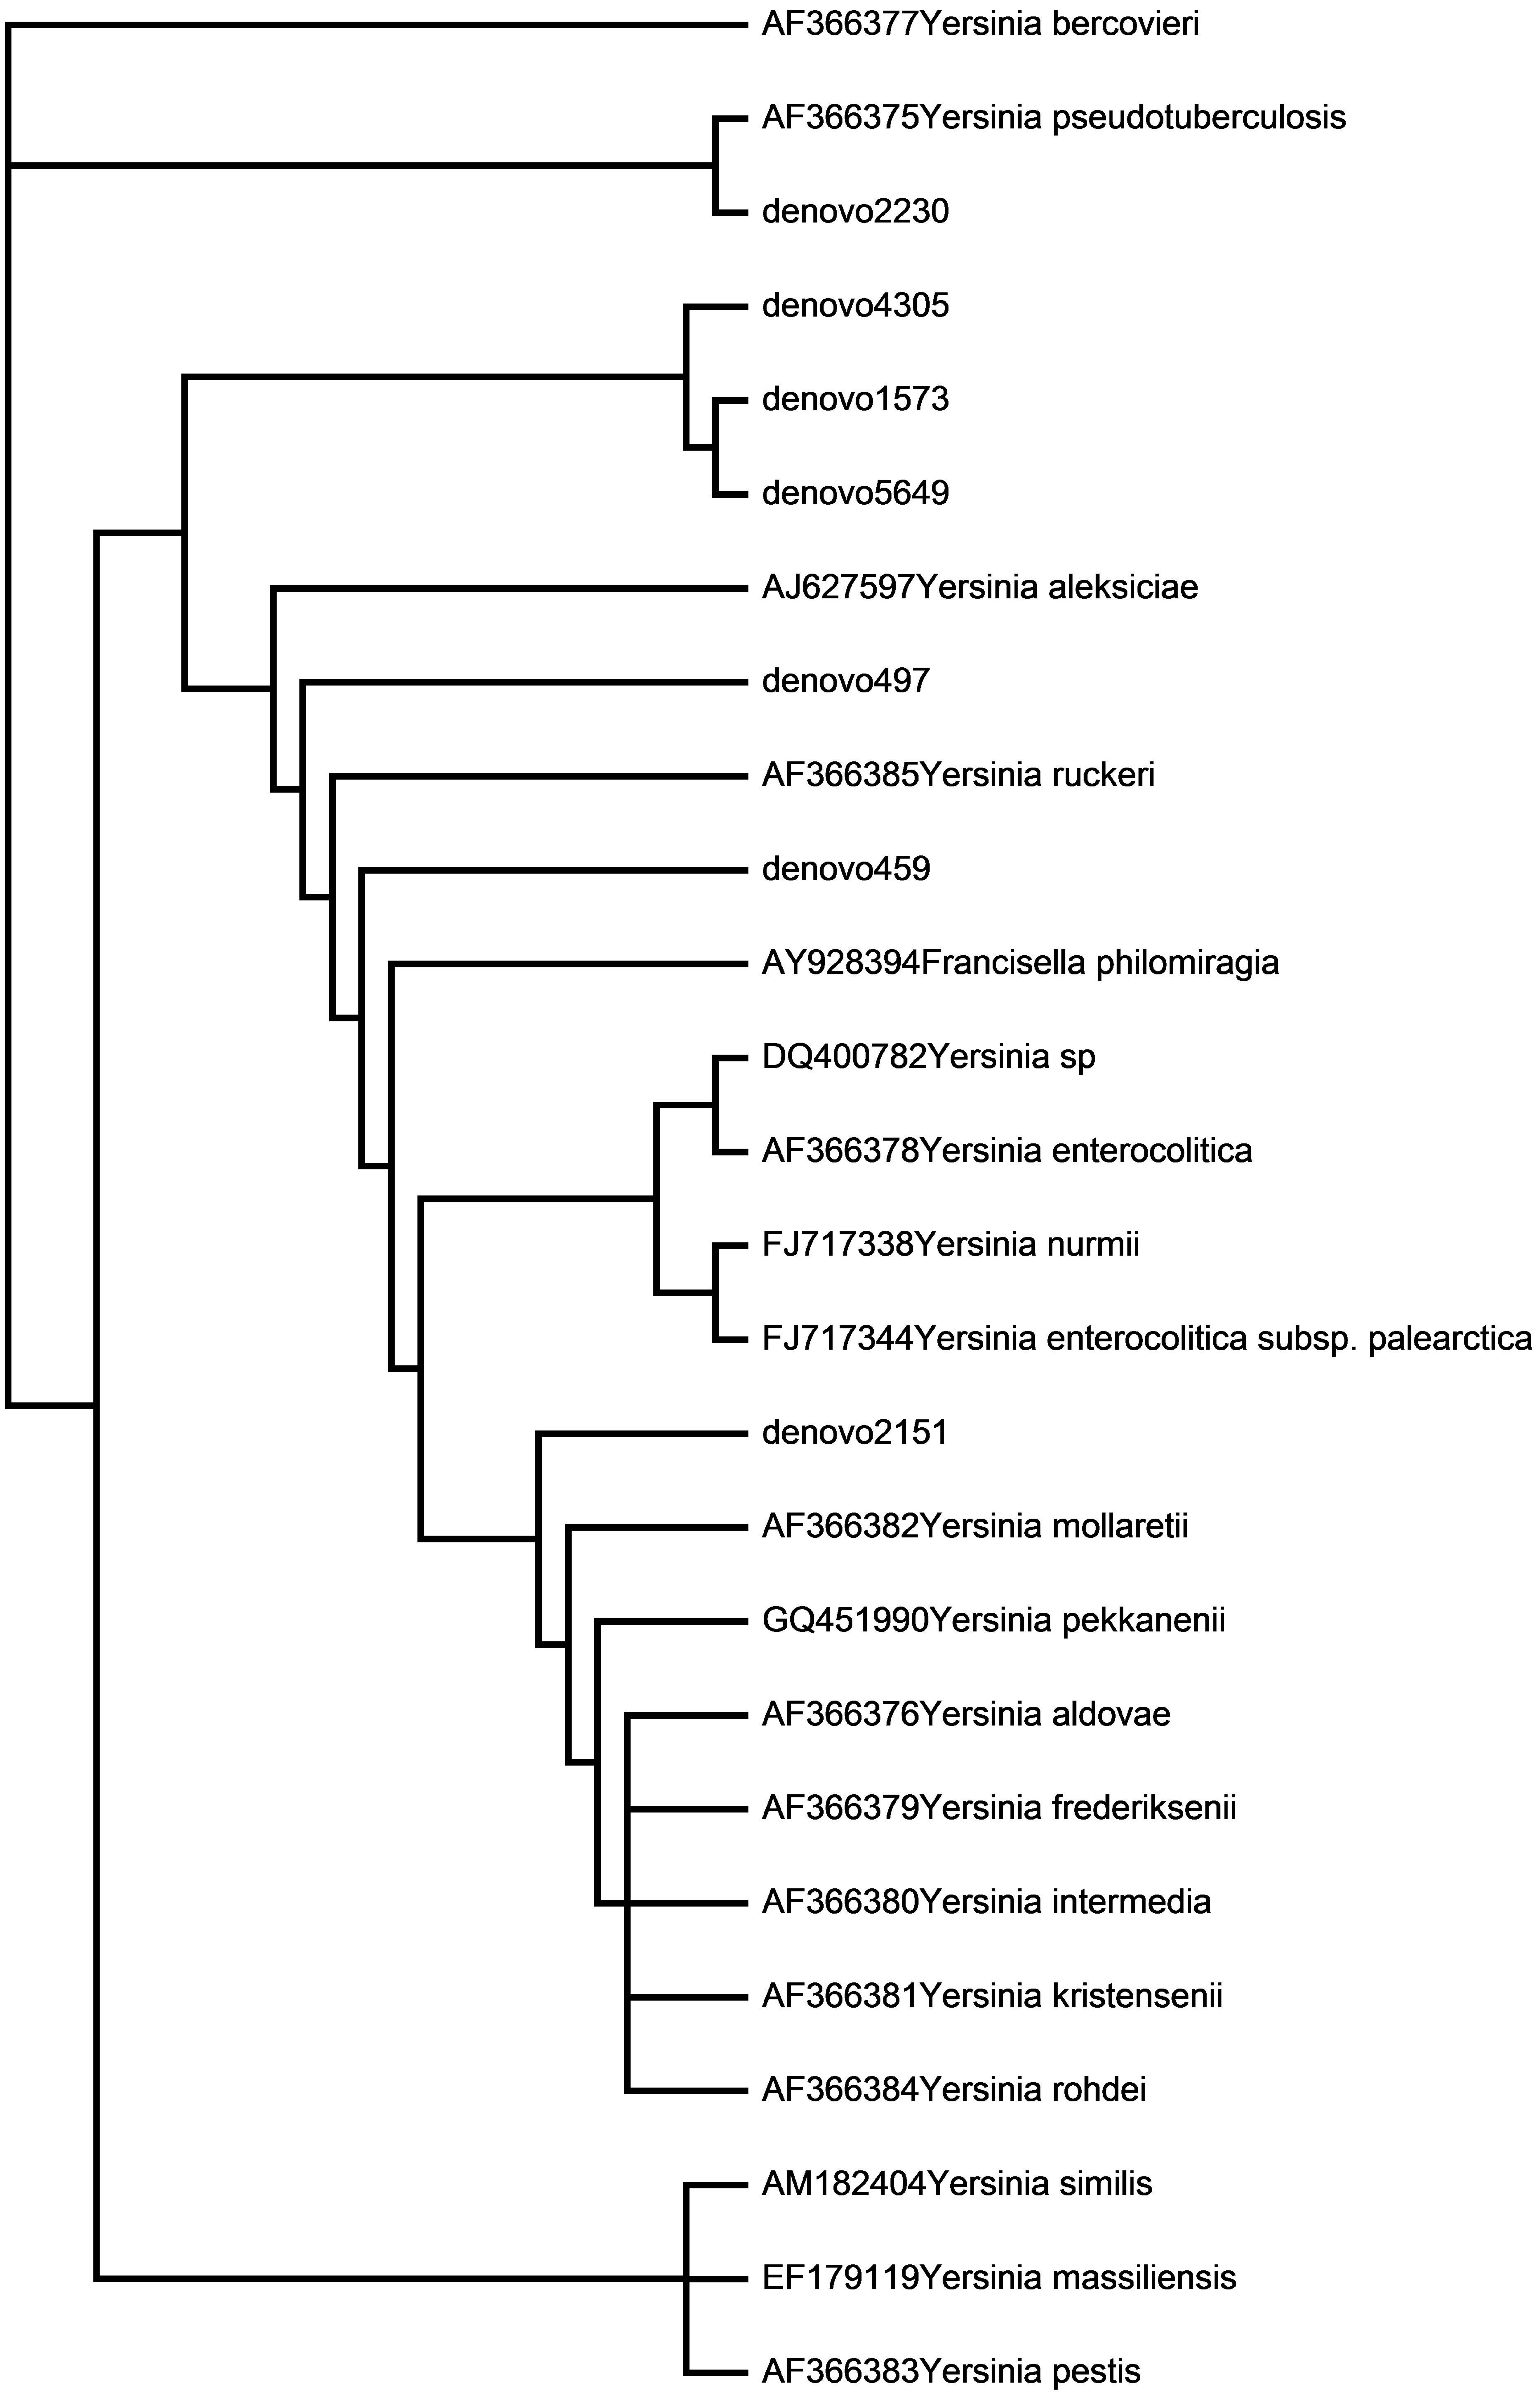

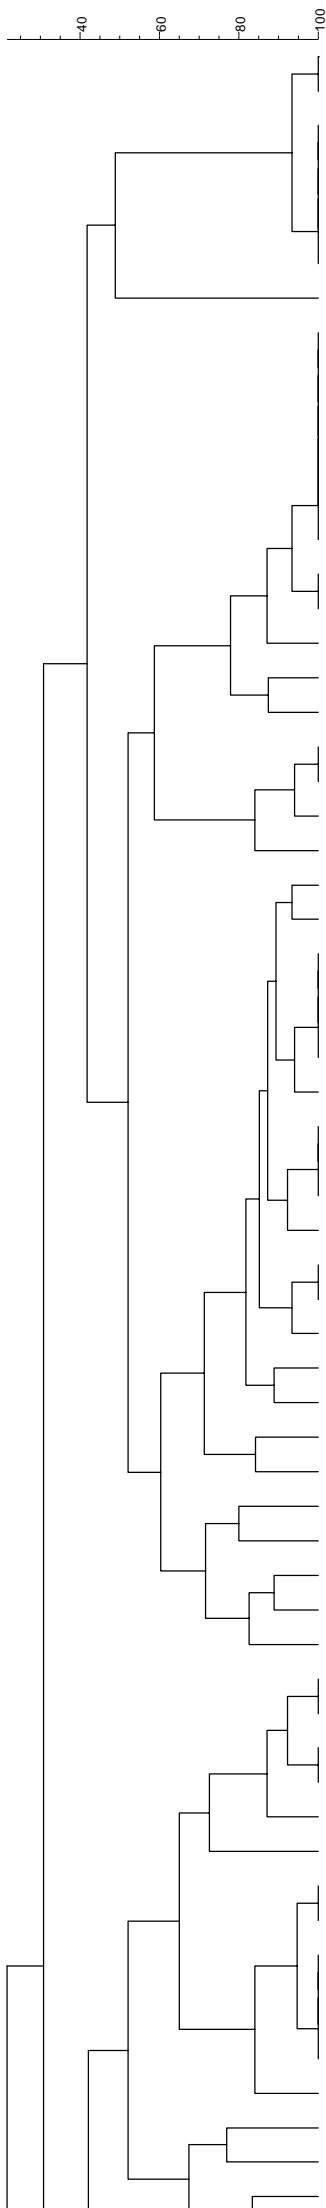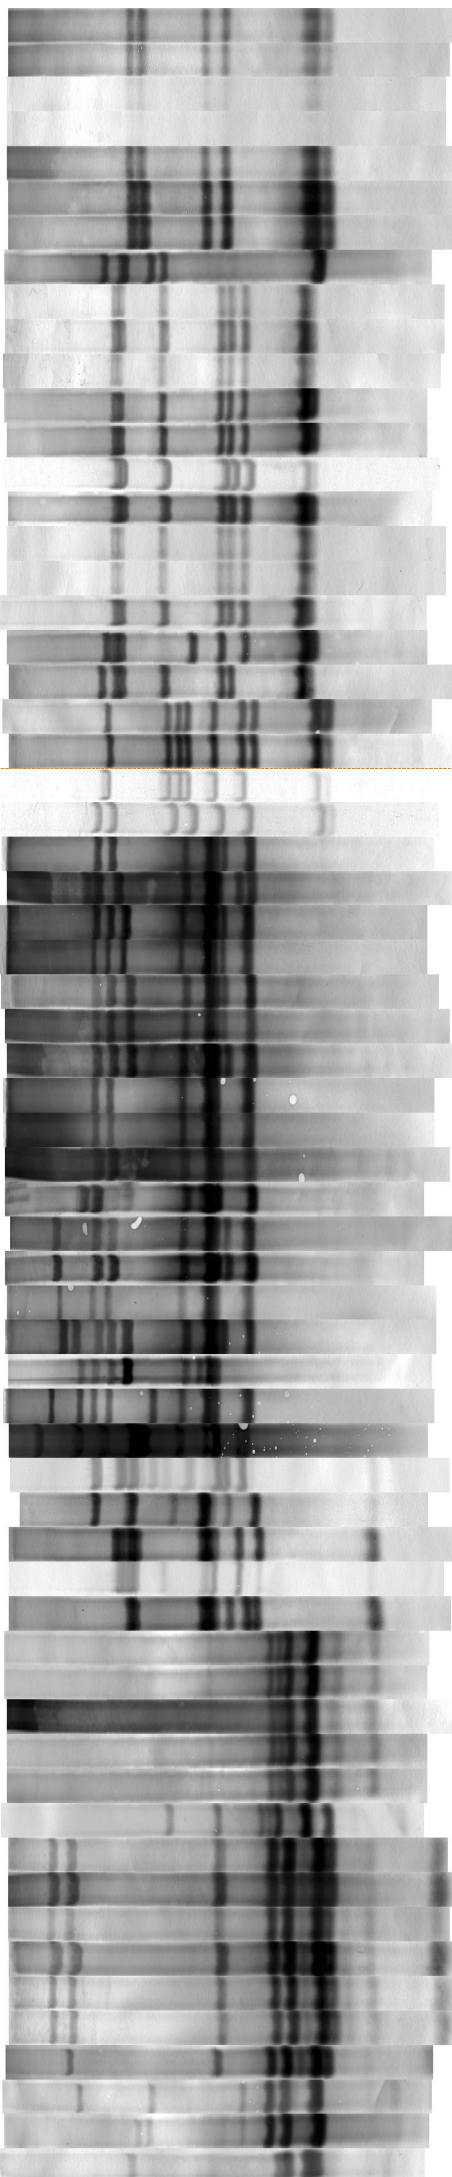

|  |                                                   |           |
|--|---------------------------------------------------|-----------|
|  |                                                   | JP51-6    |
|  |                                                   | JP51-9    |
|  |                                                   | JP51-1    |
|  |                                                   | JP51-3    |
|  |                                                   | JP51-2    |
|  |                                                   | JP51-4    |
|  |                                                   | JP51-7    |
|  |                                                   | JP62-1    |
|  |                                                   | JP51-2    |
|  |                                                   | JP13-4    |
|  |                                                   | JPP13-7   |
|  |                                                   | JP62-11   |
|  |                                                   | JP62-15   |
|  | <i>Carnobacterium maltaromaticum</i>              | ATCC 355. |
|  | <i>Carnobacterium maltaromaticum</i>              | ATCC 355. |
|  |                                                   | JPP13-3   |
|  |                                                   | JPP13-6   |
|  |                                                   | JPi68-9   |
|  |                                                   | JP62-10   |
|  |                                                   | JPP22     |
|  |                                                   | JP122-3   |
|  |                                                   | JP1-1     |
|  | <i>Lactobacillus sakei</i> subsp. <i>sakei</i>    | DSM 200.  |
|  | <i>Lactobacillus sakei</i> subsp. <i>carnosus</i> | CCUG 31.  |
|  |                                                   | JP62-14   |
|  |                                                   | JPP3-6    |
|  |                                                   | JP105-6   |
|  |                                                   | JP105-8   |
|  |                                                   | JPP13-10  |
|  |                                                   | JPP13-4   |
|  |                                                   | JPP3-2    |
|  |                                                   | JP62-8    |
|  |                                                   | JP62-13   |
|  |                                                   | JPP3-9    |
|  |                                                   | JPi46-1-3 |
|  |                                                   | JPP3-5    |
|  |                                                   | JPP3-10   |
|  |                                                   | JP62-3    |
|  |                                                   | JP62-7    |
|  | <i>Brochothrix thermosphacta</i>                  | CCUG 35.  |
|  |                                                   | JP62-9    |
|  | <i>Brochothrix campestris</i>                     | DSM 4712  |
|  | <i>Lactococcus lactis</i> ssp. <i>hordniae</i>    | LMG 8520  |
|  | <i>Lactococcus lactis</i> ssp. <i>cremoris</i>    | LMG 6897  |
|  |                                                   | JPi46-1-4 |
|  | <i>Lactococcus lactis</i> ssp. <i>lactis</i>      | LMG 6890  |
|  |                                                   | JPi46-1-6 |
|  |                                                   | JP62-2    |
|  |                                                   | JP62-5    |
|  |                                                   | JPP13-9   |
|  |                                                   | JP105-5   |
|  |                                                   | JP105-2   |
|  | <i>Carnobacterium gallinarum</i>                  | CCUG 30.  |
|  |                                                   | JPi46-2-3 |
|  |                                                   | JPi46-2-9 |
|  |                                                   | JPi46-2-7 |
|  |                                                   | JPi46-2-6 |
|  |                                                   | JPi46-2-2 |
|  |                                                   | JPi46-2-1 |
|  | <i>Lactobacillus curvatus</i>                     | ATCC 256. |
|  |                                                   | JP67-3    |
|  |                                                   | JP67-4    |
|  |                                                   | JPi68-8   |

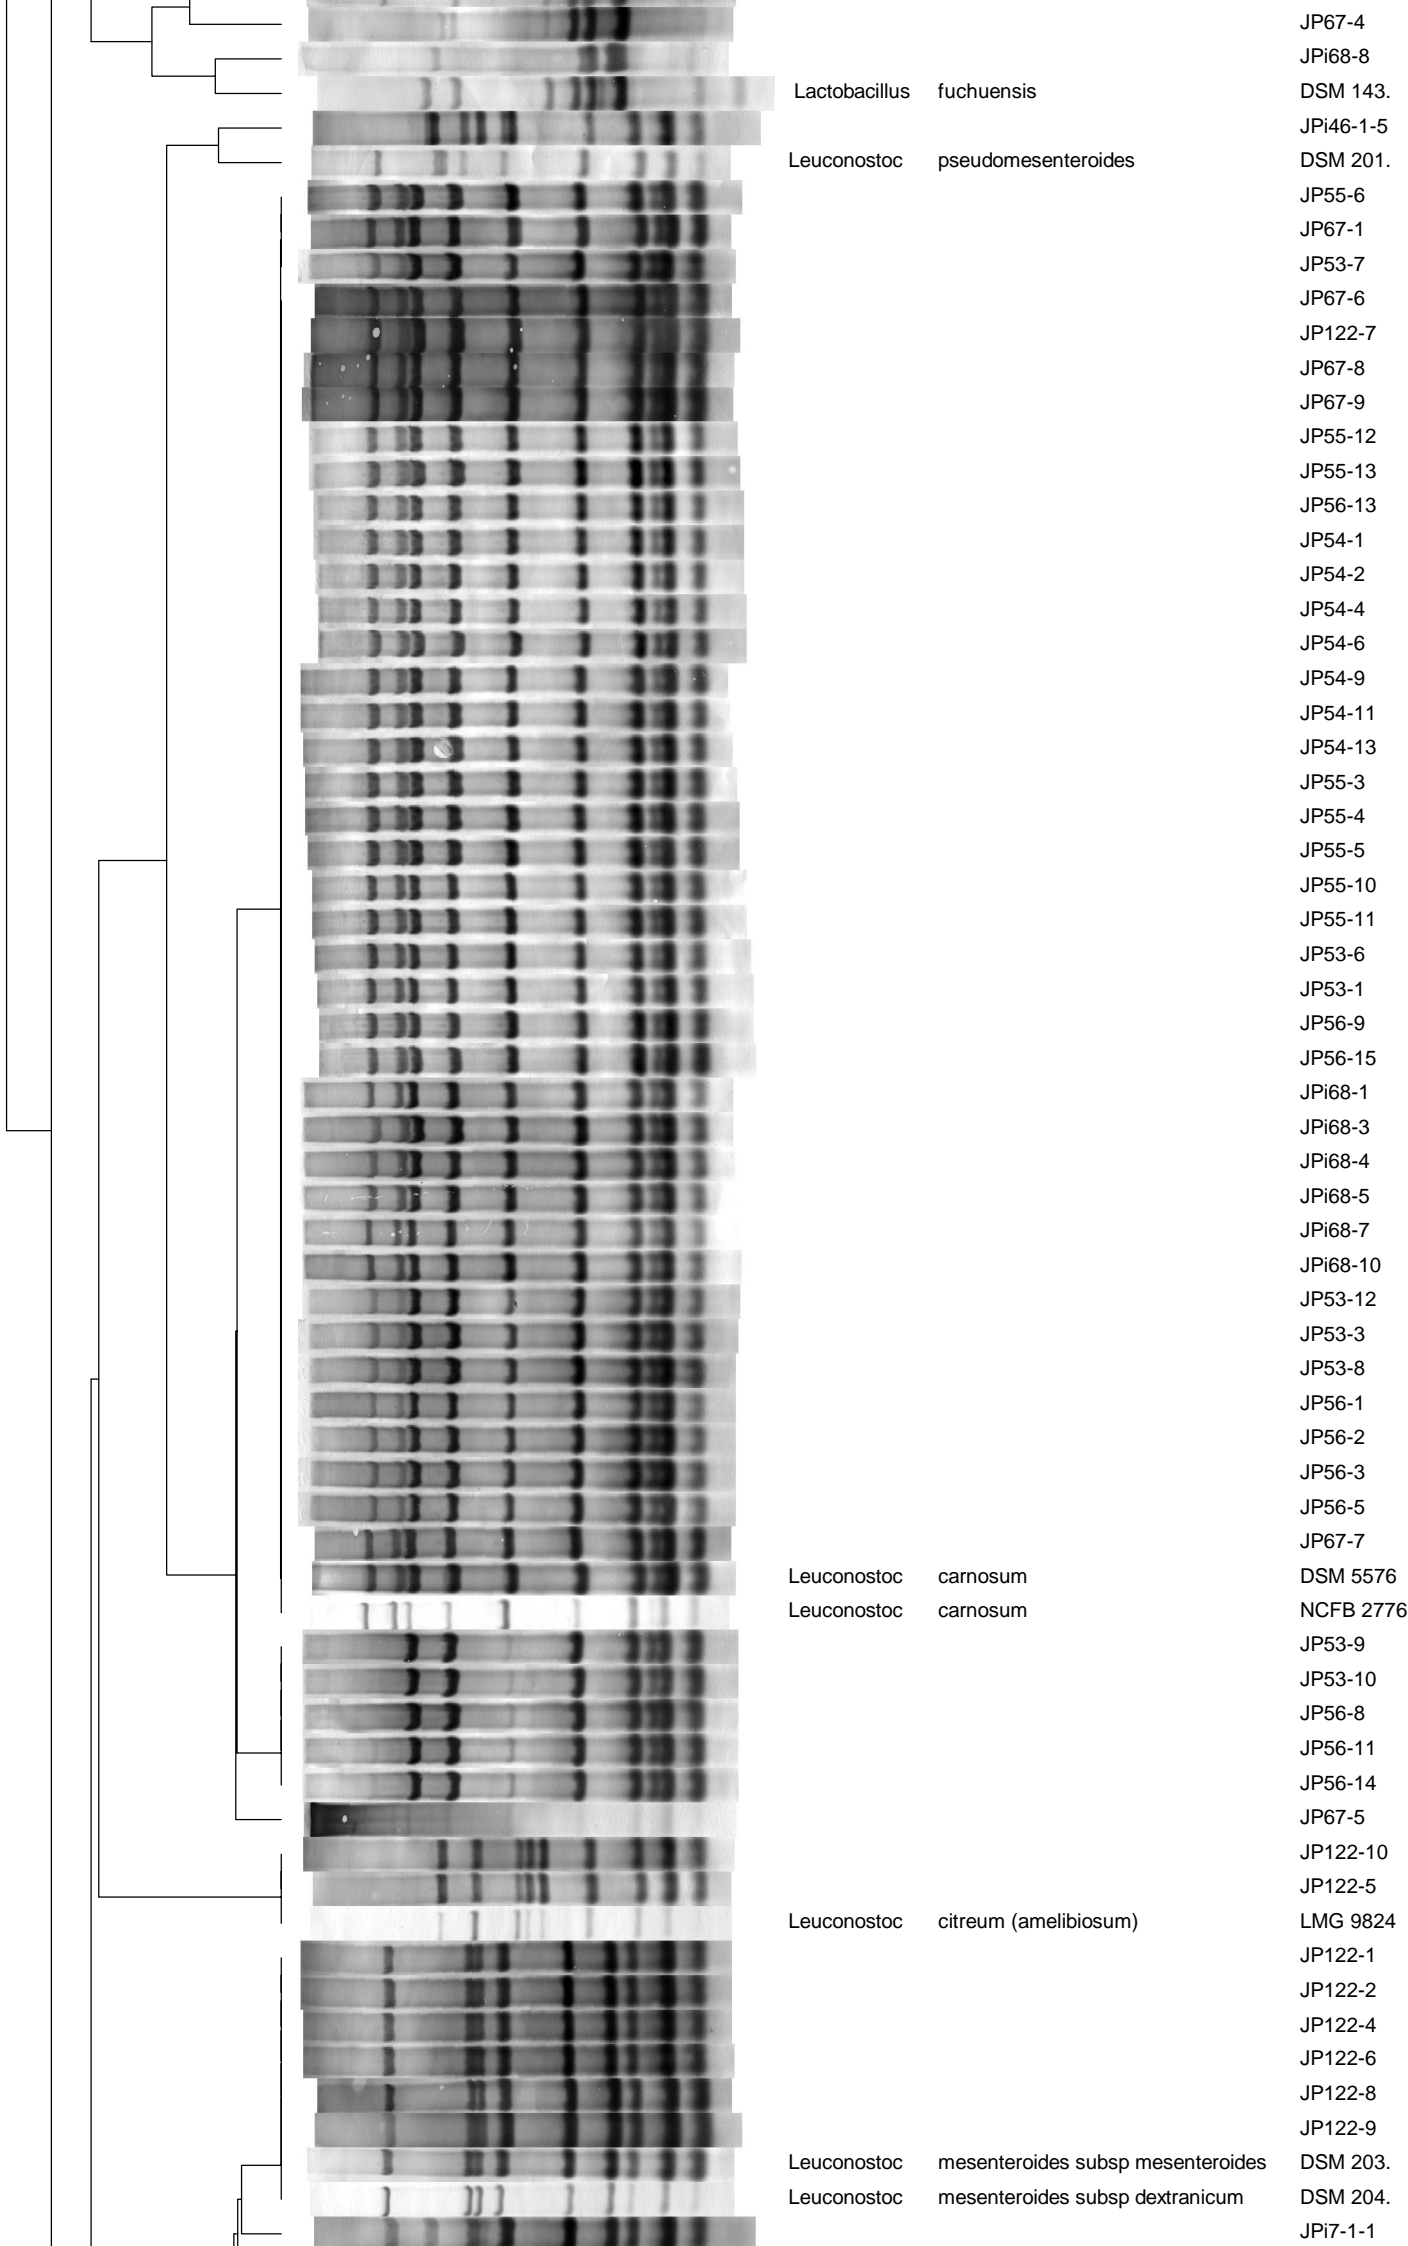

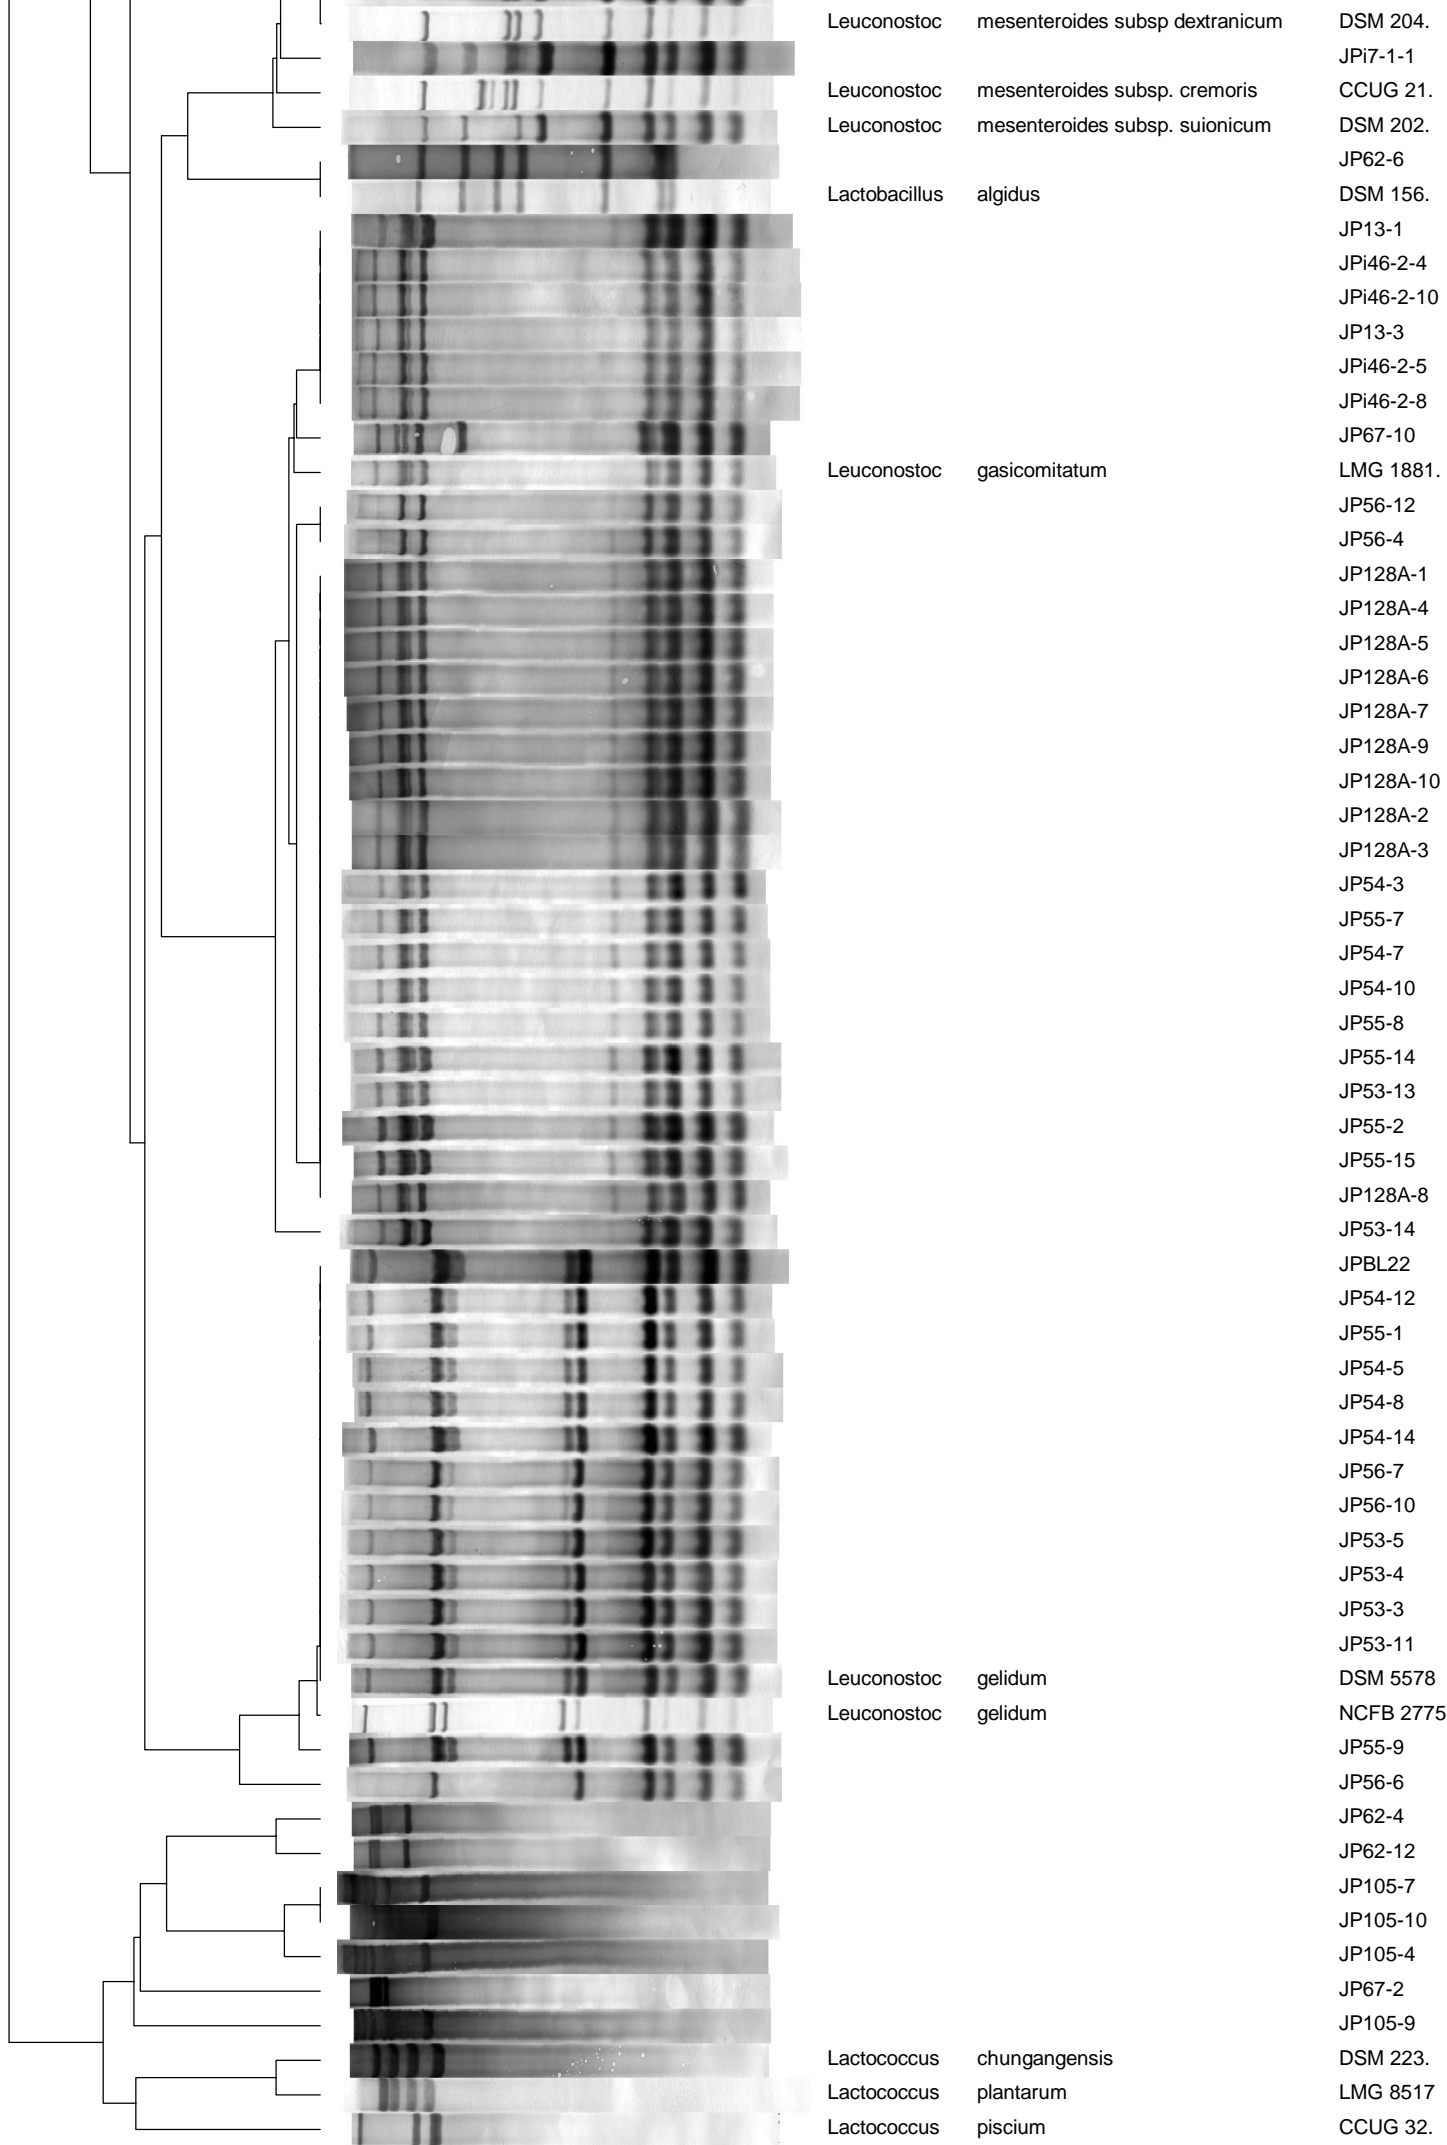

Supplement: AEM.02228-15_zam999116635so1.pdf [file AEM.02228-15_zam999116635so1.pdf]
